# Supplementary material for: Nutritional Evaluation of Sea Buckthorn “Hippophae rhamnoides” Berries and the Pharmaceutical Potential of the Fermented Juice
Source: MDPI journal article supplement (doi:10.3390/fermentation8080391), 2022-08-14
Supplement: s1 [file s1]

**Table S1.** Experimental design and results of central composite design for optimization of probiotic growth in sea buckthorn juice.

| Run | Block   | Std | Non coded levels               |                              |                  | Probiotic Growth<br>(log CFU/mL) |
|-----|---------|-----|--------------------------------|------------------------------|------------------|----------------------------------|
|     |         |     | Juice concentration (g/100 mL) | Inoculum Size<br>(mL/100 mL) | Temperature (C°) |                                  |
| 1   | Block 1 | 9   | 20                             | 1                            | 37               | 8.5                              |
| 2   | Block 1 | 8   | 30                             | 1.5                          | 42               | 6.8                              |
| 3   | Block 1 | 10  | 20                             | 1                            | 37               | 8.5                              |
| 4   | Block 1 | 11  | 20                             | 1                            | 37               | 8.5                              |
| 5   | Block 1 | 4   | 30                             | 1.5                          | 32               | 7.5                              |
| 6   | Block 1 | 7   | 10                             | 1.5                          | 42               | 6.5                              |
| 7   | Block 1 | 12  | 20                             | 1                            | 37               | 8.5                              |
| 8   | Block 1 | 1   | 10                             | 0.5                          | 32               | 6.2                              |
| 9   | Block 1 | 6   | 30                             | 0.5                          | 42               | 6.1                              |
| 10  | Block 1 | 2   | 30                             | 0.5                          | 32               | 7                                |
| 11  | Block 1 | 5   | 10                             | 0.5                          | 42               | 5.8                              |
| 12  | Block 1 | 3   | 10                             | 1.5                          | 32               | 7.2                              |
| 13  | Block 2 | 14  | 36.8179                        | 1                            | 37               | 8.65                             |
| 14  | Block 2 | 15  | 20                             | 0.159104                     | 37               | 7.4                              |
| 15  | Block 2 | 18  | 20                             | 1                            | 45.409           | 5.1                              |
| 16  | Block 2 | 16  | 20                             | 1.8409                       | 37               | 8.8                              |
| 17  | Block 2 | 13  | 3.18207                        | 1                            | 37               | 7.4                              |
| 18  | Block 2 | 19  | 20                             | 1                            | 37               | 8.5                              |
| 19  | Block 2 | 20  | 20                             | 1                            | 37               | 8.5                              |
| 20  | Block 2 | 17  | 20                             | 1                            | 28.591           | 6.2                              |

**Table S2.** Experimental design and results of central composite design for optimization of probiotic growth in sea buckthorn juice.

| Source                 | Sum of Squares | df | Mean Square | F-value | p-value |                    |
|------------------------|----------------|----|-------------|---------|---------|--------------------|
| Block                  | 0.4625         | 1  | 0.4625      |         |         |                    |
| <b>Model</b>           | 23.72          | 9  | 2.64        | 60.89   | <0.0001 | <b>significant</b> |
| A- Juice concentration | 1.06           | 1  | 1.06        | 24.45   | 0.0008  |                    |
| B- Inoculum Size       | 2.02           | 1  | 2.02        | 46.70   | <0.0001 |                    |
| C-Temperature          | 1.52           | 1  | 1.52        | 35.02   | 0.0002  |                    |
| AB                     | 0.0313         | 1  | 0.0313      | 0.7219  | 0.4176  |                    |
| AC                     | 0.0313         | 1  | 0.0313      | 0.7219  | 0.4176  |                    |

|                  |        |    |        |        |                   |
|------------------|--------|----|--------|--------|-------------------|
| BC               | 0.0012 | 1  | 0.0012 | 0.0289 | 0.8688            |
| A <sup>2</sup>   | 1.20   | 1  | 1.20   | 27.81  | <b>0.0005</b>     |
| B <sup>2</sup>   | 0.9934 | 1  | 0.9934 | 22.95  | <b>0.0010</b>     |
| C <sup>2</sup>   | 18.35  | 1  | 18.35  | 423.89 | <b>&lt;0.0001</b> |
| <b>Residual</b>  | 0.3896 | 9  | 0.0433 |        |                   |
| Lack of Fit      | 0.3896 | 5  | 0.0779 |        |                   |
| Pure Error       | 0.0000 | 4  | 0.0000 |        |                   |
| <b>Cor Total</b> | 24.58  | 19 |        |        |                   |

---
